# Supplementary material
Source: PubMed Central journal article supplement (PMC5258849)
Supplement: NIHMS804321-supplement-Supp_Fig_S1.pdf [file NIHMS804321-supplement-Supp_Fig_S1.pdf]

## 1584 Women in Health ABC

- 31 lacked information about UI status or at least 1 body measure
- 66 had “other” types of UI
- 12 had “unknown” type of UI

## 1475 Women in Baseline Cohort (Year 1)

- 1030 with no monthly UI
- 212 with predominantly SUI
- 233 with predominantly UUI

- 68 had “other” types of UI
- 2 had “unknown” types of UI
- 19 deceased
- 6 withdrew from the study
- 321 failed to follow up for other/unknown reasons

## 1137 Women at Follow-Up (Year 4)

- 653 without worsening or persistent UI
- 164 with worsening/persistent predominantly SUI
- 320 with worsening/persistent predominantly UUI
